# Supplementary material
Source: PubMed Central journal article supplement (PMC4914385)
Supplement: NIHMS791755-supplement-Supplemental_Information.pdf [file NIHMS791755-supplement-Supplemental_Information.pdf]

## Supplemental Figures

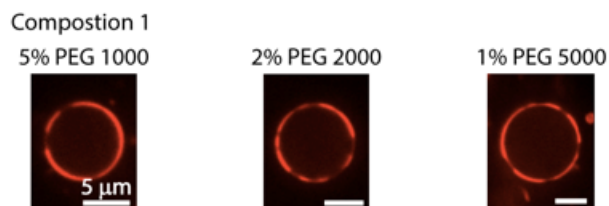

**Figure S1.** Vesicles with multiple small domains appear near transition points in low  $T_m$  mixtures. Fluorescence confocal image slices (0.3 mol% Texas Red-DPPE) of phase separated GUVs containing 5 mol% of PEG1000-DPPE, 2 mol% PEG2000-DPPE, and 1 mol% PEG5000-DPPE. Near the transition phase separated vesicles contained many small domains rather than a single  $L_D$  and  $L_O$  domain. For determining the phase separation percentage these vesicles were considered to be phase separated vesicles. All scale bars correspond to 5  $\mu\text{m}$ .

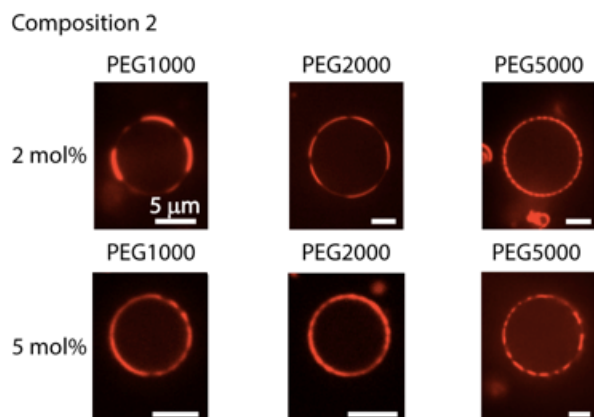

**Figure S2.** Vesicles with multiple small domains appear in high  $T_m$  mixtures. Fluorescence confocal image slices (0.3 mol% Texas Red-DPPE) of phase separated GUVs containing 2 mol% and 5 mol% PEG1000-DPPE, PEG2000-DPPE, and PEG5000-DPPE. At these molar concentrations in composition 2 mixtures, phase separated vesicles contained many small domains rather than a single  $L_D$  and  $L_O$  domain in the high  $T_m$  mixtures. For determining the phase separation percentage these vesicles were considered to be phase separated vesicles. All scale bars correspond to 5  $\mu\text{m}$ .

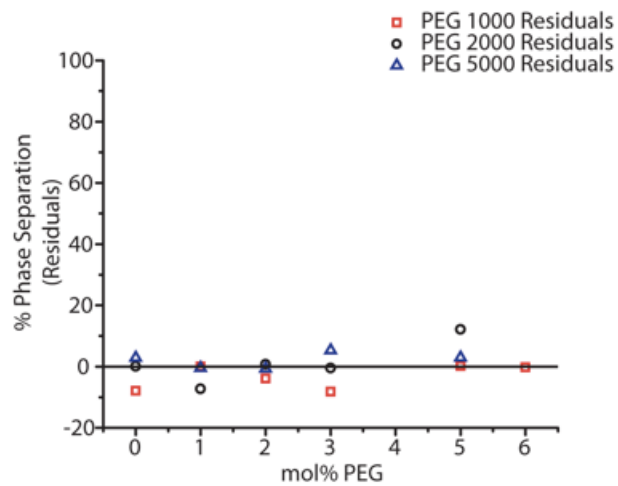

**Figure S3.** The residuals of the sigmoidal fits for composition 1 in Figures 1D, 2D, and 4B.

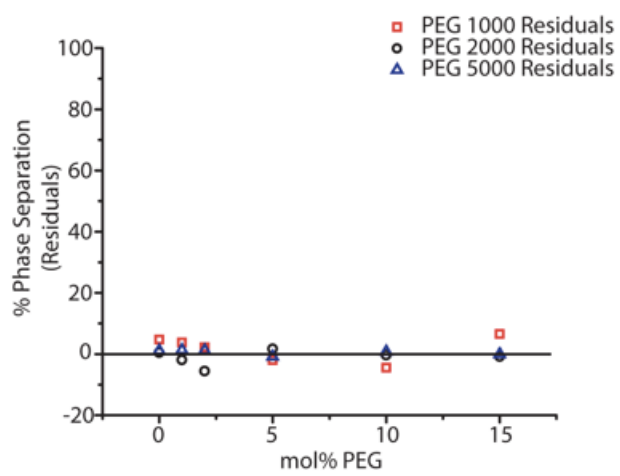

**Figure S4.** The residuals of the sigmoidal fits for composition 2 in Figures 4D and 6D.
